# Supplementary material
Source: PubMed Central journal article supplement (PMC3445775)

**A**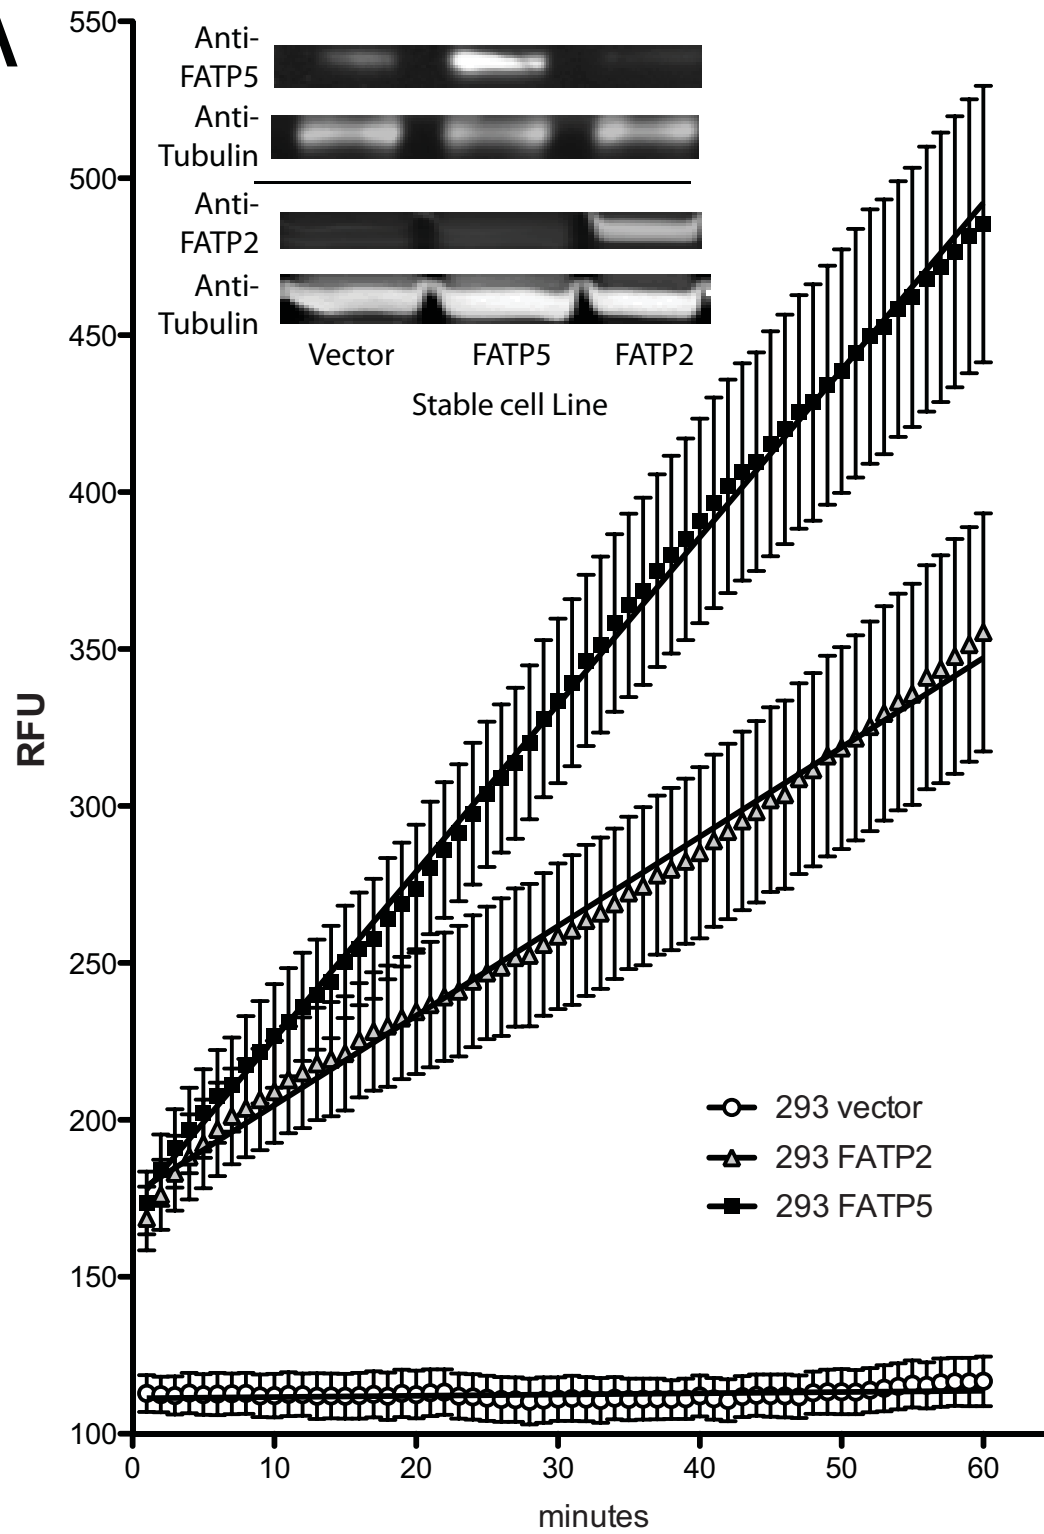**B**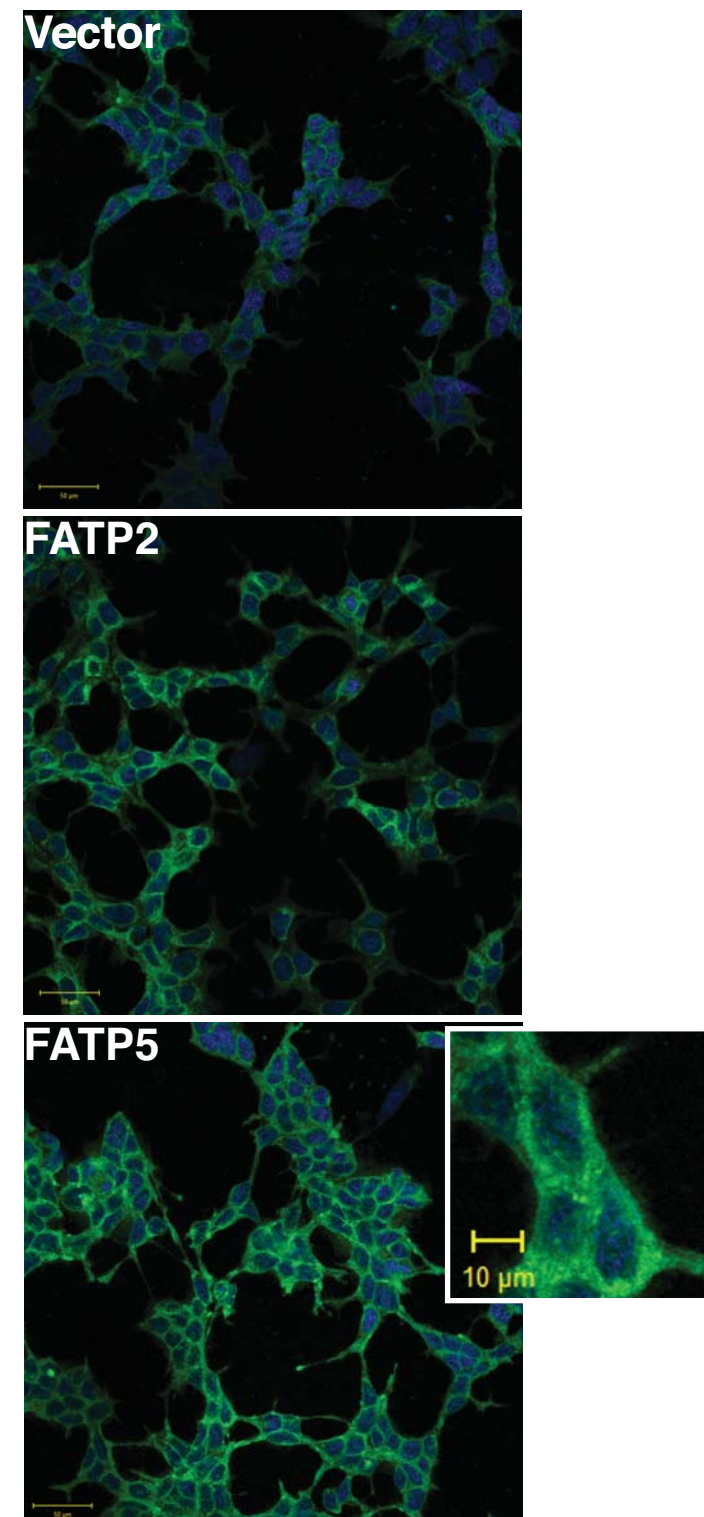

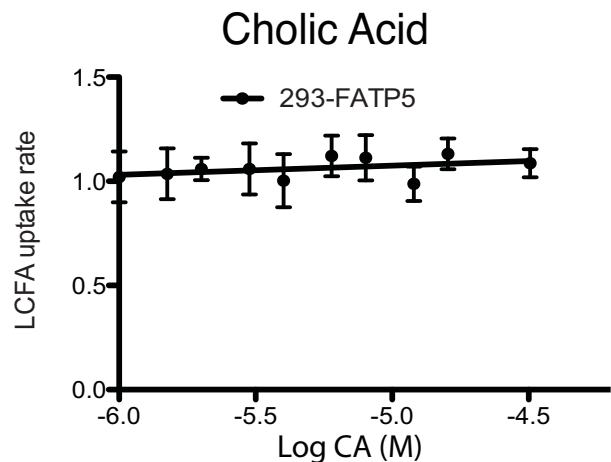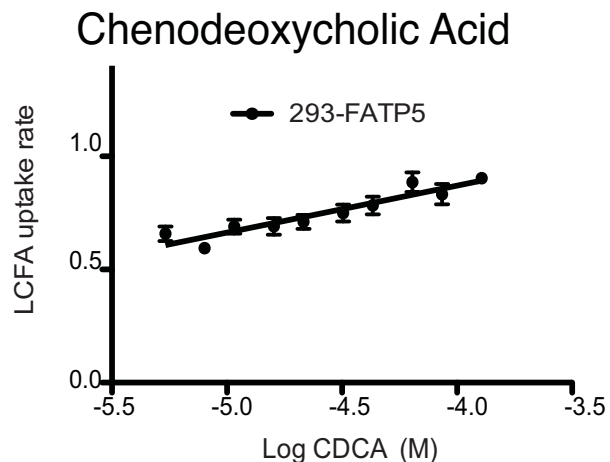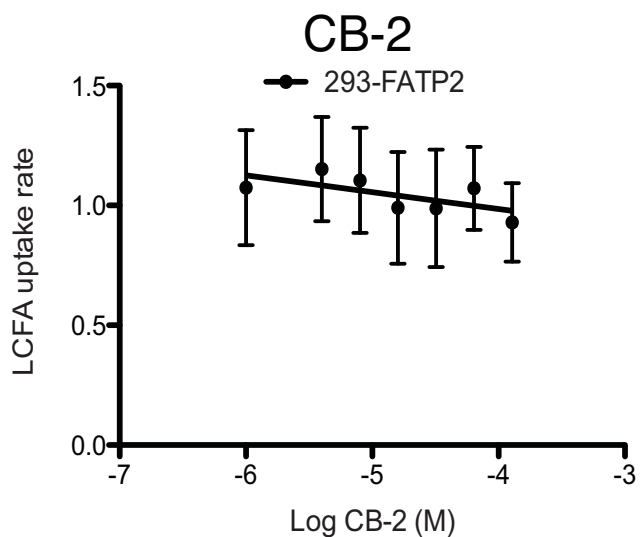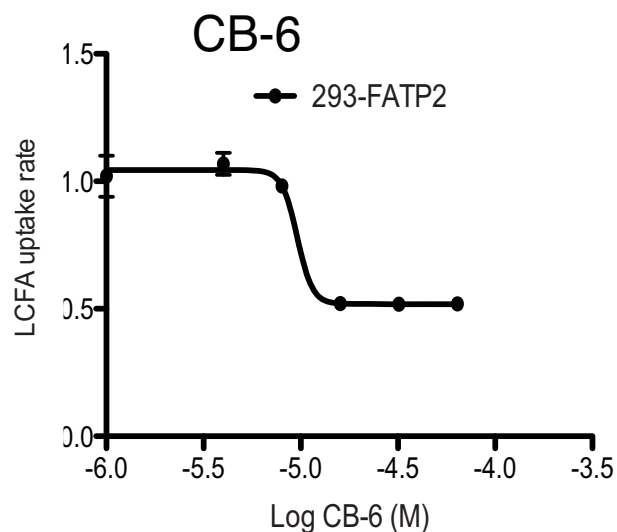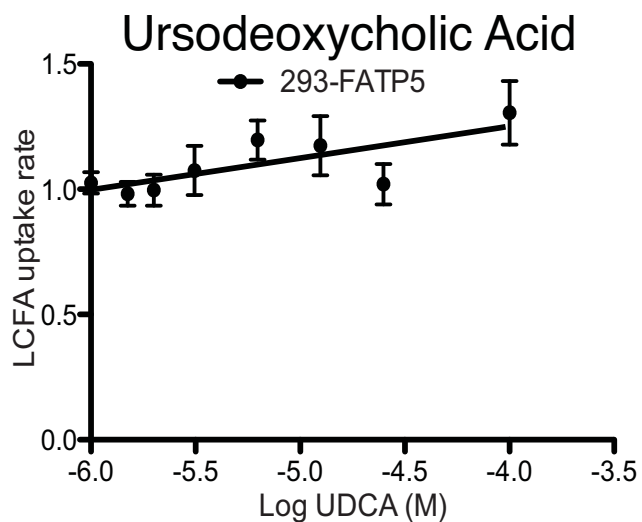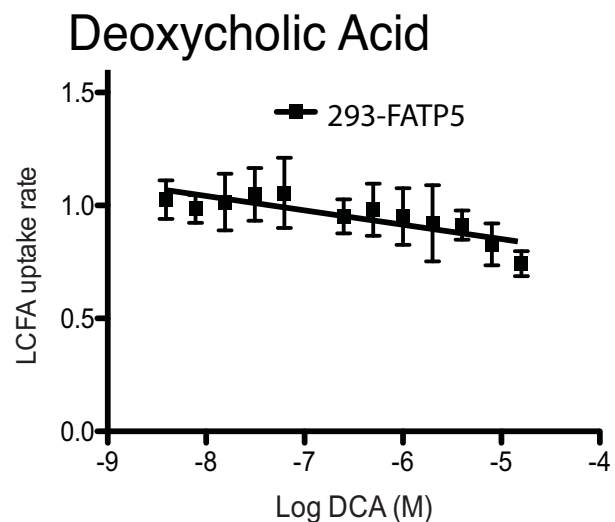

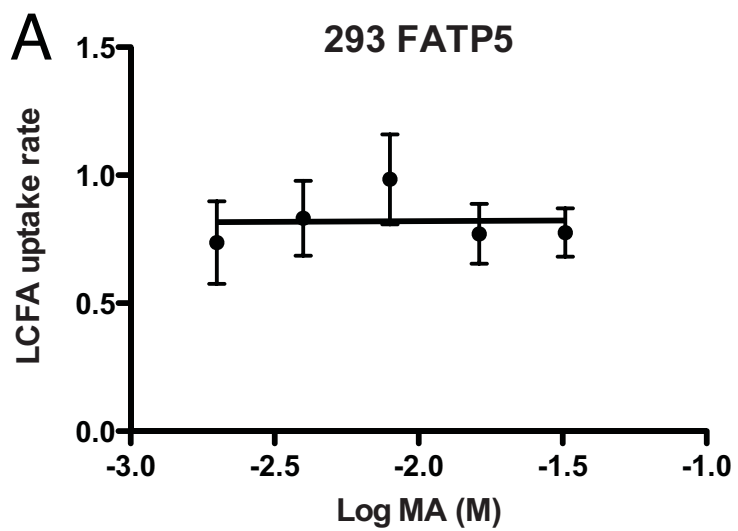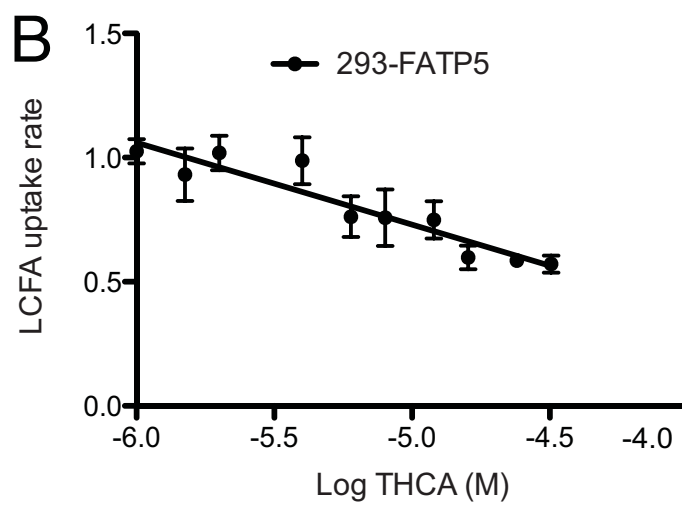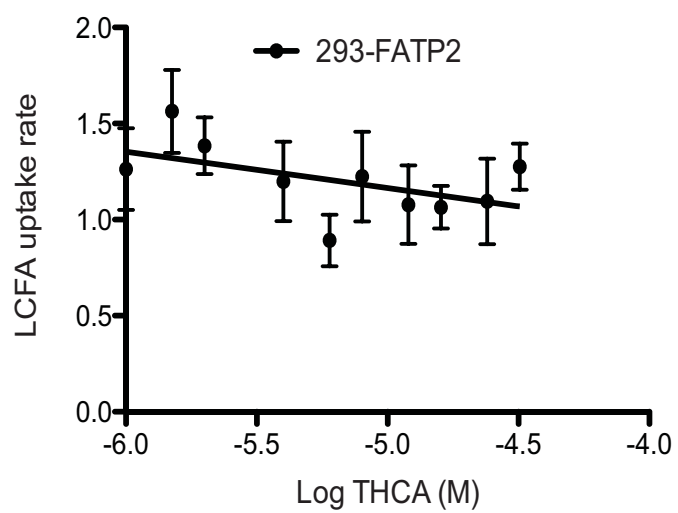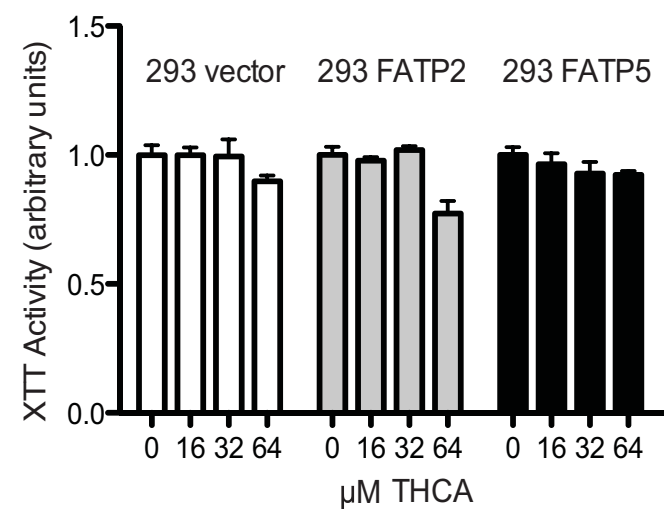

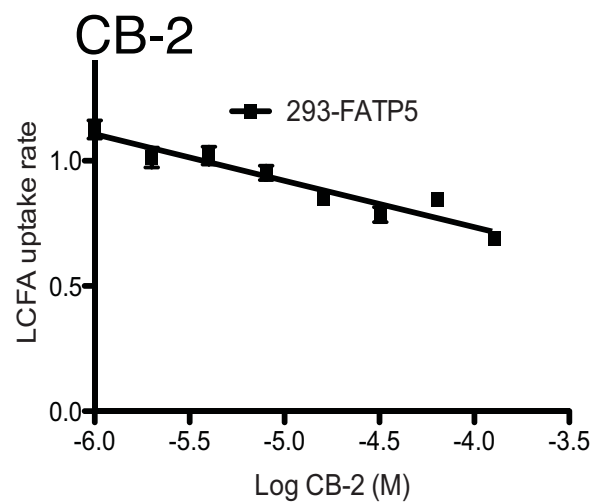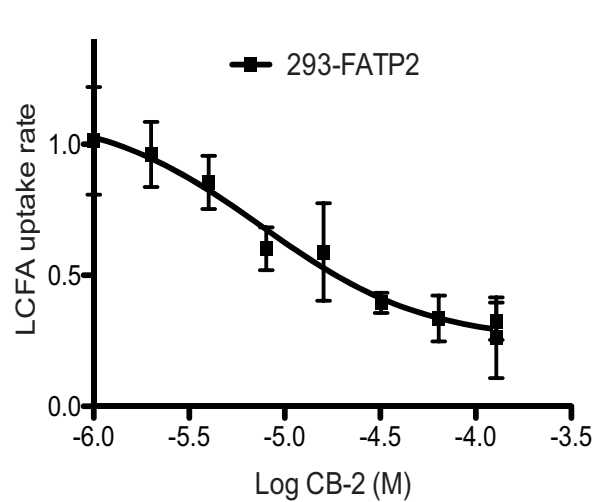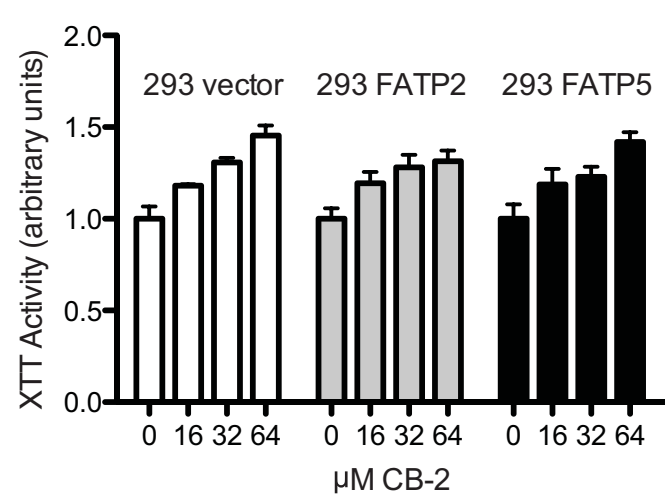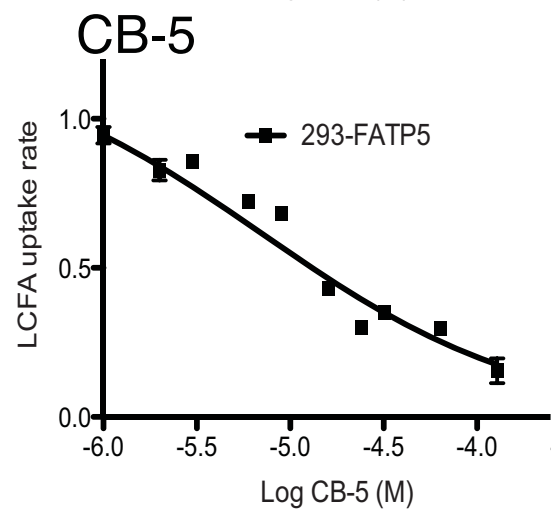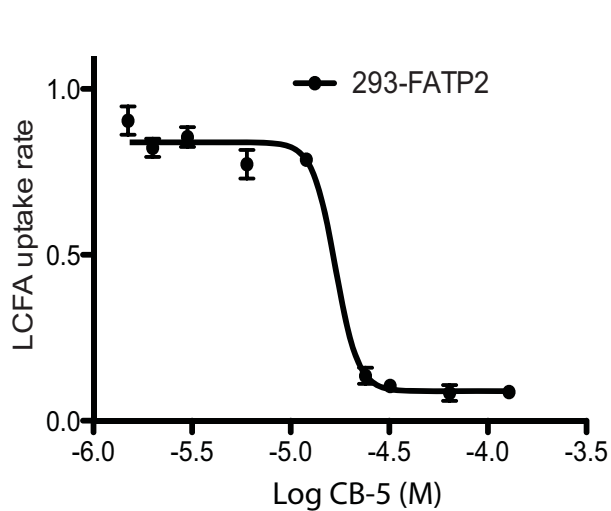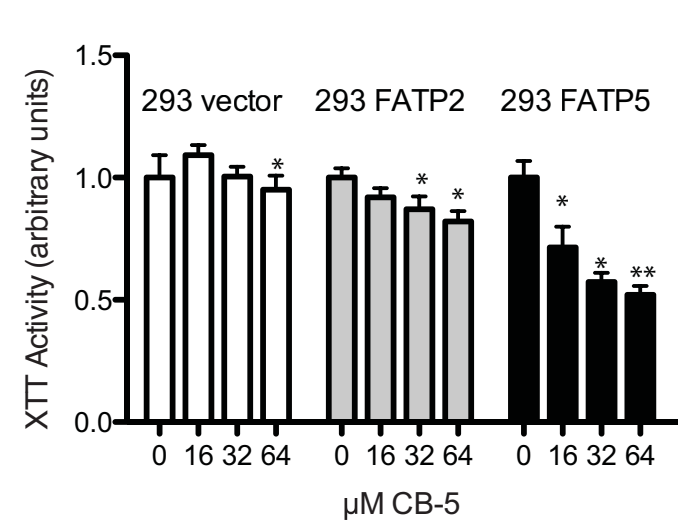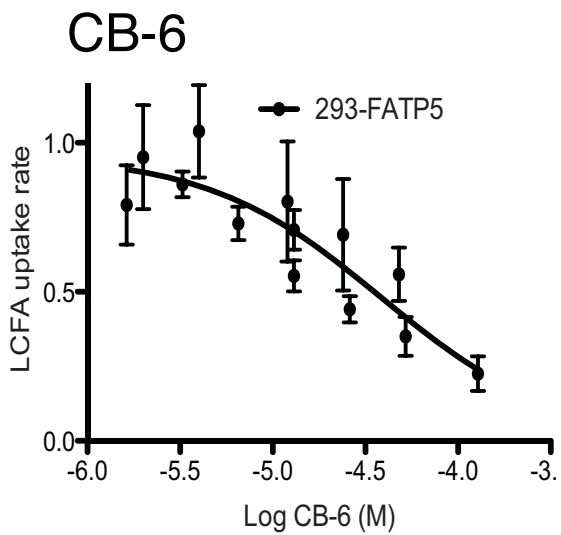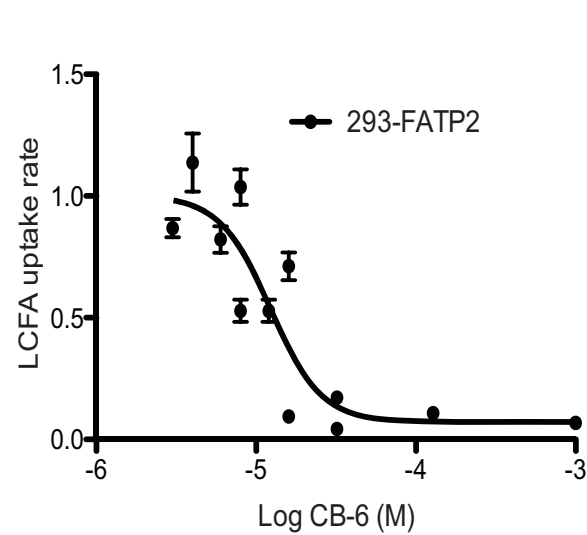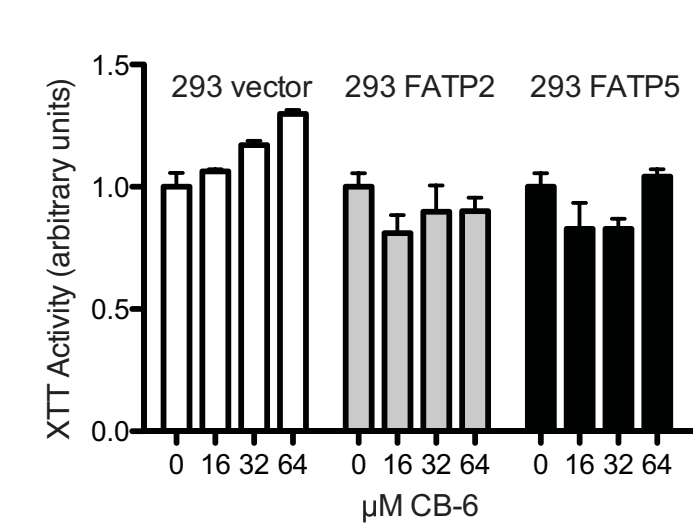

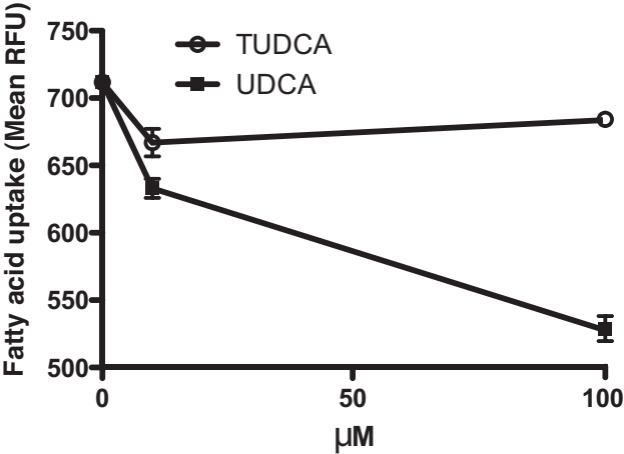

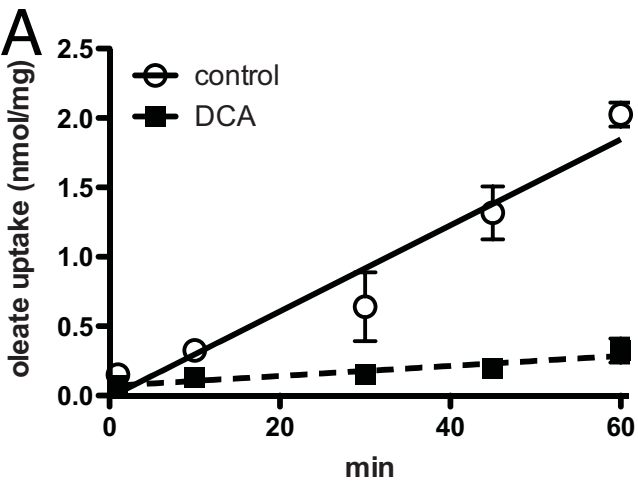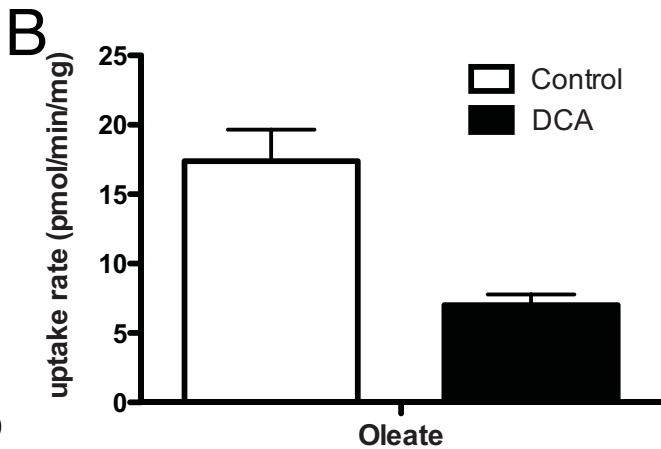

# Injection

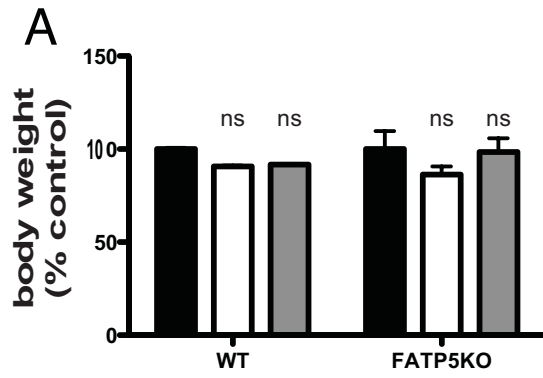

# Feeding

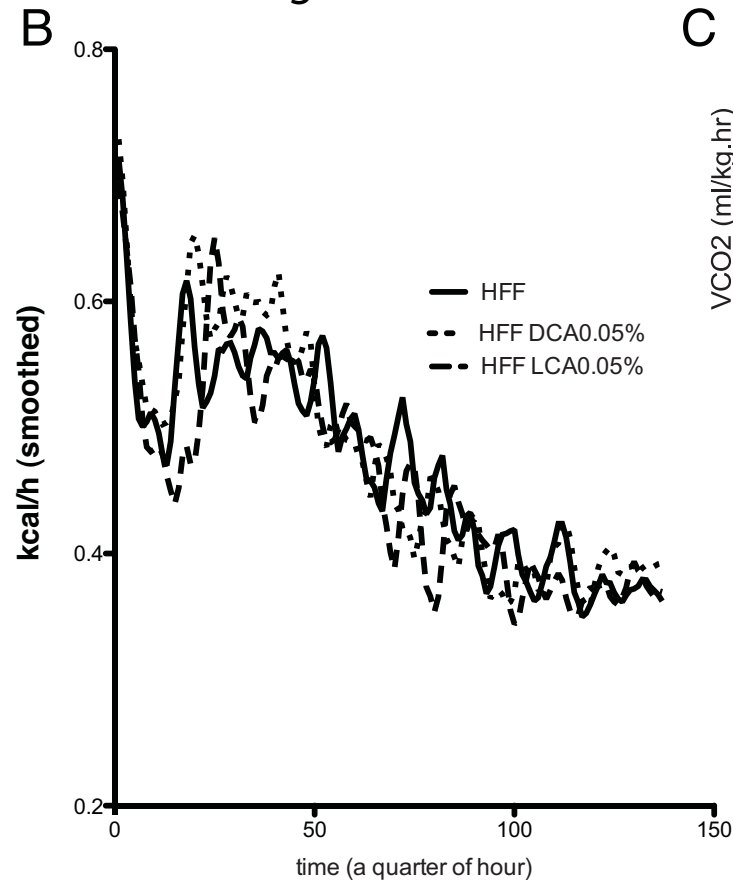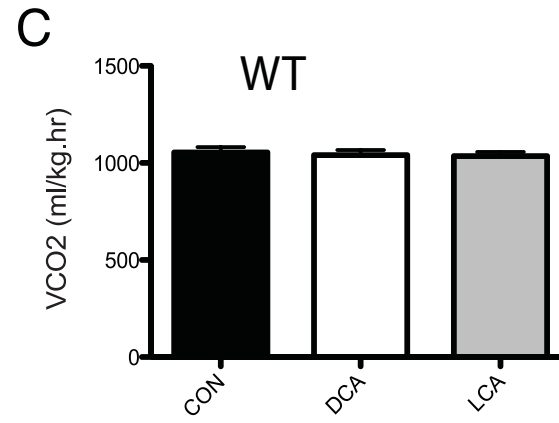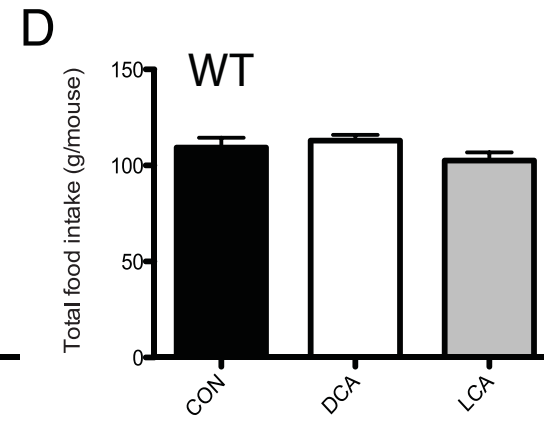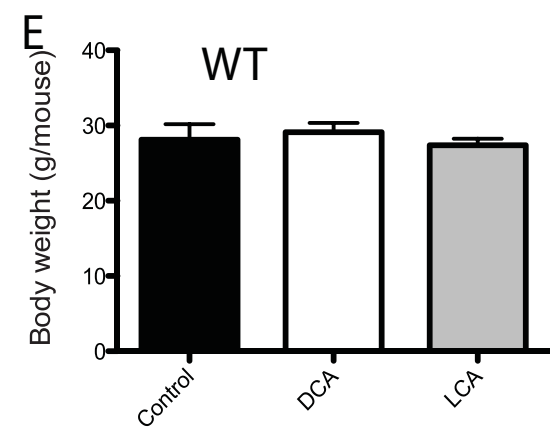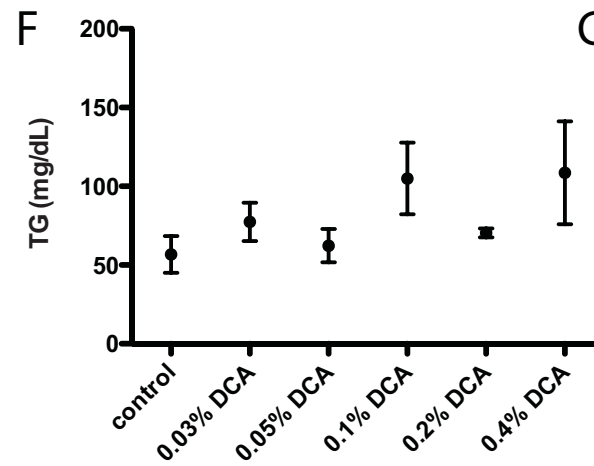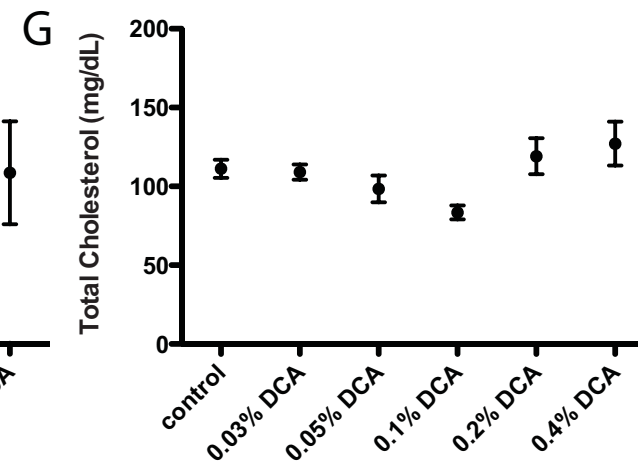

**Control**

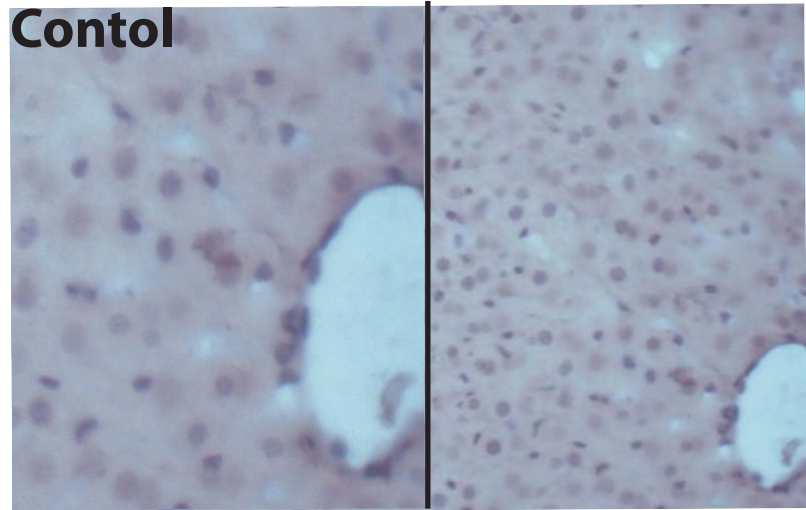

**DCA**

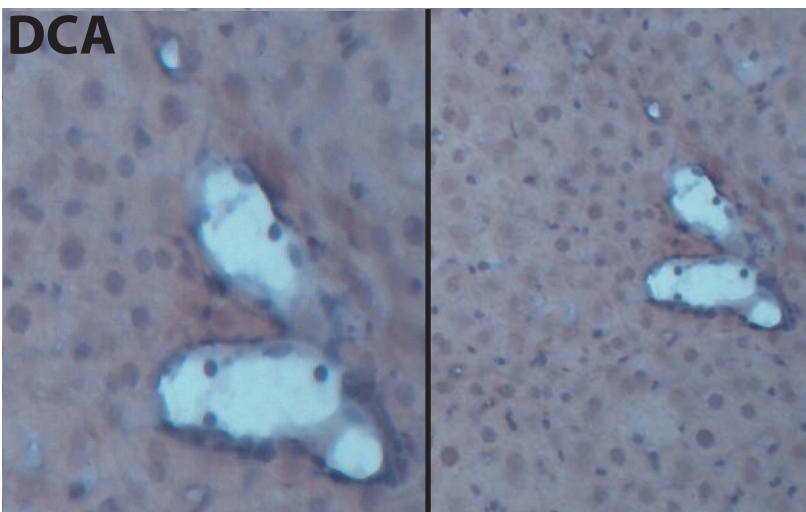

**LCA**

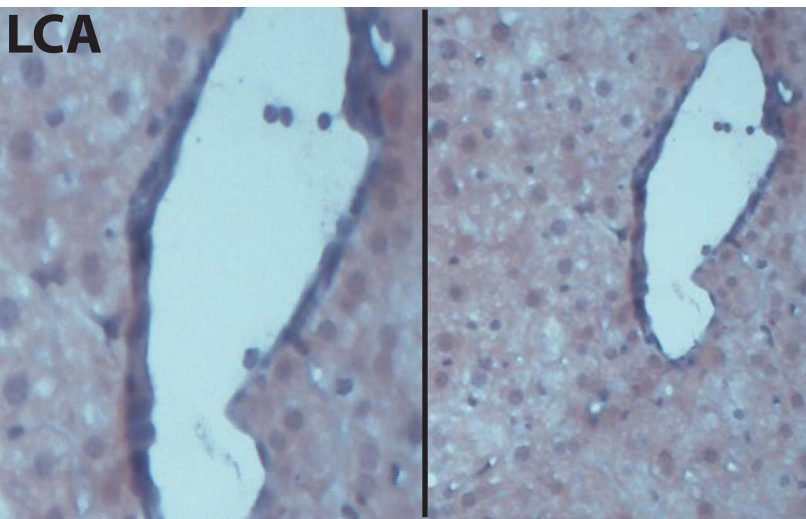



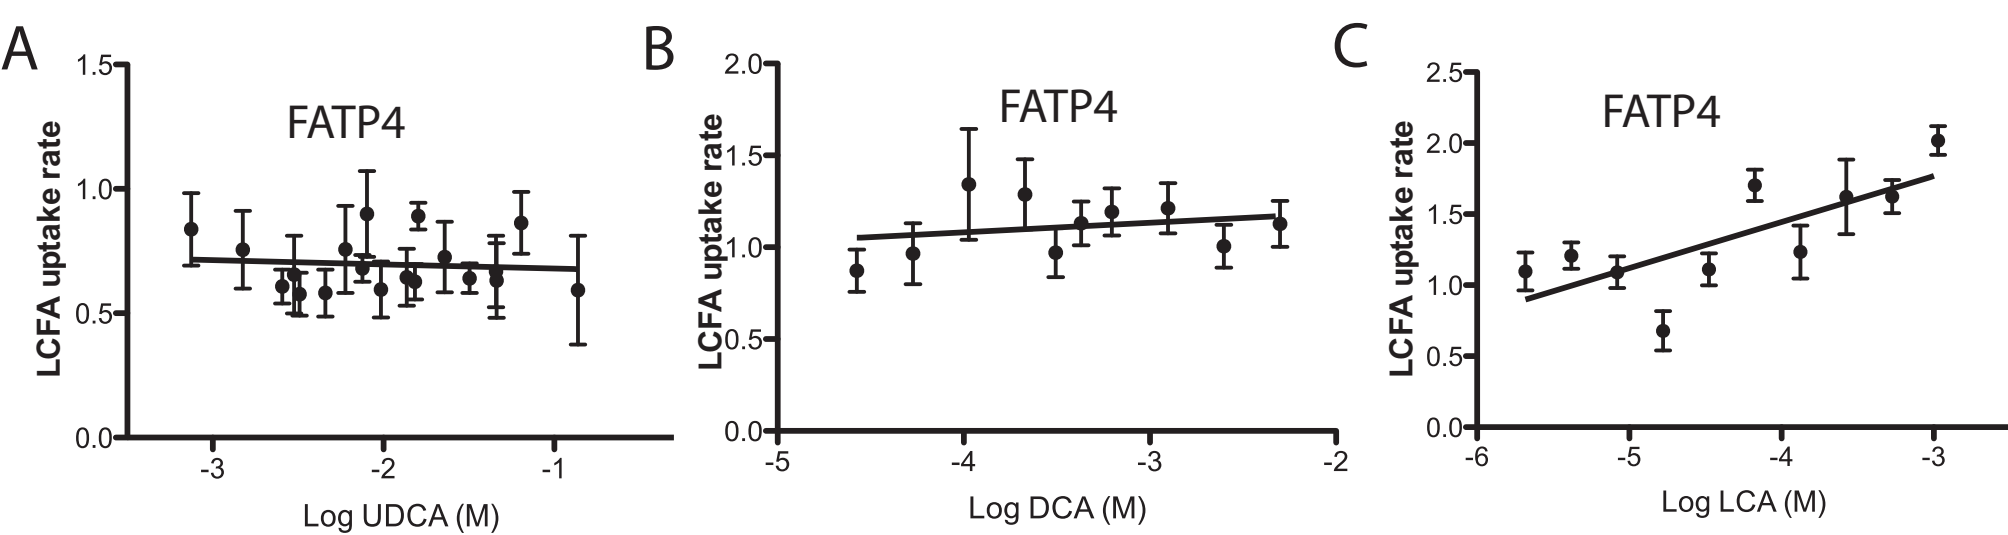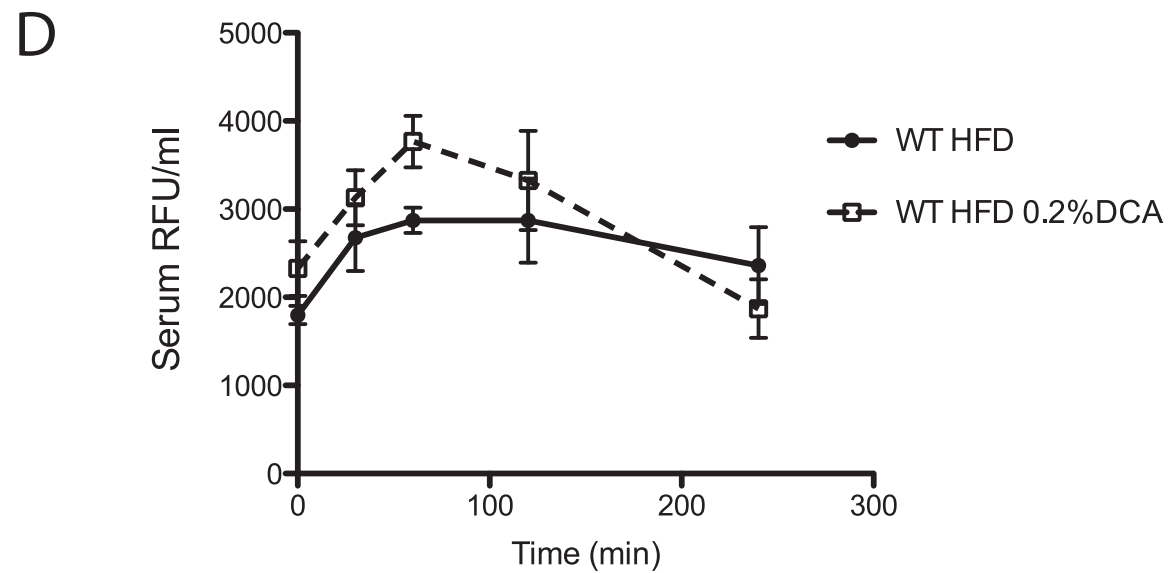

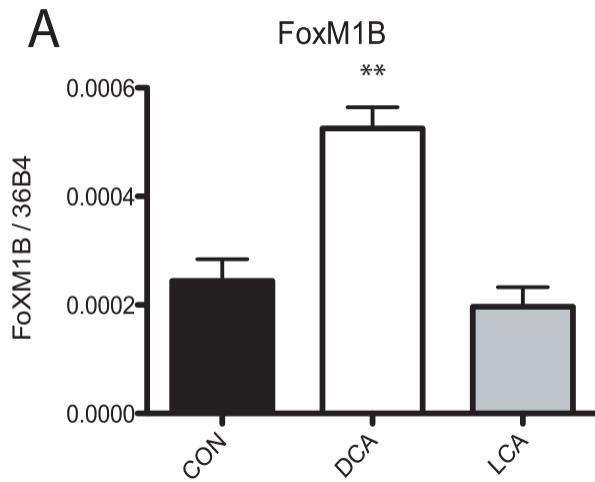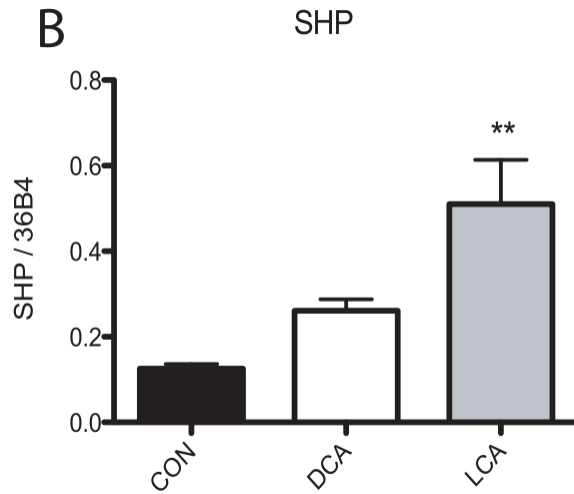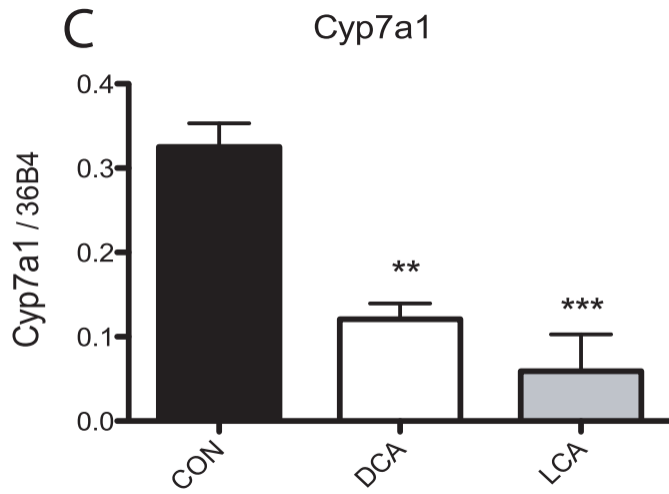

Supplement: NIHMS373681-supplement-Supp_Fig_S1-_S10.pdf [file NIHMS373681-supplement-Supp_Fig_S1-_S10.pdf]
